# Supplementary material for: Development of LCA benchmarks for Austrian torrent control structures
Source: Springer Nature journal article supplement (doi:10.1007/s11367-019-01618-6), 2019-04-17
Supplement: MOESM2 [file 16665840]

## Appendix B

**Table S4** LCA benchmarks for the impact indicators: CED, ADP - fossil fuels, ADP - elements, AP, ODP, EP, POCP, HTP inf, TETP inf

| **Impact indicator** | | **Cumulative energy demand [MJ/FU]** | | | | | |
| --- | --- | --- | --- | --- | --- | --- | --- |
| **Construction phase benchmarks** | | | **Life cycle benchmarks** | | |
| **Construction type** | **Construction material** | **Target Value** | **Reference Value** | **Upper Extreme** | **Target Value** | **Reference Value** | **Upper Extreme** |
| **Submerged sill** | Reinforced concrete | 3063 | 4192 | 5862 | 8694 | 11963 | 16651 |
| Double log crib wall | 564 | 873 | 1332 | 2344 | 4312 | 7254 |
| Stone masonry | 980 | 1117 | 1323 | 2162 | 2534 | 3534 |
| **Check dam** | Reinforced concrete | 3063 | 4192 | 5862 | 8742 | 11729 | 16185 |
| Double log crib wall | 564 | 873 | 1332 | 1995 | 3119 | 4740 |
| Stone masonry | 980 | 1117 | 1323 | 2361 | 2834 | 3056 |
| **Bank protection** | Double log crib wall | 1692 | 2619 | 3996 | 7963 | 13980 | 22733 |
| Single log crib wall | 351 | 599 | 967 | 1634 | 3147 | 5379 |
| Stone masonry | 980 | 1117 | 1323 | 2200 | 2580 | 3142 |
| Riprap | 671 | 429 | 266 | 1388 | 2464 | 4072 |
| Riprap in concrete | 709 | 1135 | 1774 | 2461 | 4017 | 6327 |
| **Impact indicator** | | **Depletion of abiotic resources - fossil fuels (ADP - fossil fuels) [MJ/FU]** | | | | | |
| **Construction phase benchmarks** | | | **Life cycle benchmarks** | | |
| **Construction type** | **Construction material** | **Target Value** | **Reference Value** | **Upper Extreme** | **Target Value** | **Reference Value** | **Upper Extreme** |
| **Submerged sill** | Reinforced concrete | 2557 | 3479 | 4861 | 7346 | 9878 | 13647 |
| Double log crib wall | 514 | 810 | 1255 | 2064 | 3506 | 5605 |
| Stone masonry | 825 | 948 | 1133 | 1835 | 2148 | 2610 |
| **Check dam** | Reinforced concrete | 2557 | 3479 | 4861 | 7407 | 9831 | 13409 |
| Double log crib wall | 514 | 810 | 1255 | 1793 | 2819 | 4346 |
| Stone masonry | 825 | 948 | 1133 | 2004 | 2355 | 2860 |
| **Bank protection** | Double log crib wall | 1541 | 2431 | 3765 | 6826 | 12375 | 20635 |
| Single log crib wall | 342 | 567 | 902 | 1470 | 2900 | 5027 |
| Stone masonry | 825 | 948 | 1133 | 1835 | 2180 | 2684 |
| Riprap | 238 | 393 | 623 | 1243 | 2196 | 3575 |
| Riprap in concrete | 619 | 1002 | 1576 | 2115 | 3375 | 5223 |
| **Impact indicator** | | **Depletion of abiotic resources - elements, ultimate reserves (ADP - elements) [kg antimony eq./FU]** | | | | | |
| **Construction phase benchmarks** | | | **Life cycle benchmarks** | | |
| **Construction type** | **Construction material** | **Target Value** | **Reference Value** | **Upper Extreme** | **Target Value** | **Reference Value** | **Upper Extreme** |
| **Submerged sill** | Reinforced concrete | 2,00E-04 | 3,00E-04 | 5,10E-04 | 6,00E-04 | 9,00E-04 | 1,46E-03 |
| Double log crib wall | 2,23E-05 | 5,35E-05 | 9,90E-05 | 8,91E-05 | 2,28E-04 | 4,30E-04 |
| Stone masonry | 6,95E-05 | 1,09E-04 | 1,70E-04 | 1,57E-04 | 2,48E-04 | 3,80E-04 |
| **Check dam** | Reinforced concrete | 2,00E-04 | 3,00E-04 | 5,10E-04 | 5,70E-04 | 9,20E-04 | 1,44E-03 |
| Double log crib wall | 2,23E-05 | 5,35E-05 | 9,90E-05 | 7,38E-05 | 1,90E-04 | 3,60E-04 |
| Stone masonry | 6,95E-05 | 1,09E-04 | 1,70E-04 | 1,71E-04 | 2,65E-04 | 4,00E-04 |
| **Bank protection** | Double log crib wall | 6,68E-05 | 1,60E-04 | 2,97E-04 | 2,98E-04 | 7,78E-04 | 1,50E-03 |
| Single log crib wall | 1,34E-05 | 3,56E-05 | 6,90E-05 | 6,11E-05 | 1,71E-04 | 3,30E-04 |
| Stone masonry | 6,95E-05 | 1,09E-04 | 1,70E-04 | 1,59E-04 | 2,58E-04 | 4,00E-04 |
| Riprap | 2,07E-05 | 4,02E-05 | 6,90E-05 | 1,06E-04 | 2,37E-04 | 4,30E-04 |
| Riprap in concrete | 6,70E-05 | 1,29E-04 | 2,20E-04 | 2,22E-04 | 4,12E-04 | 6,90E-04 |
| **Impact indicator** | | **Acidification potential - average Europe (AP) [kg SO2 eq./FU]** | | | | | |
| **Construction phase benchmarks** | | | **Life cycle benchmarks** | | |
| **Construction type** | **Construction material** | **Target Value** | **Reference Value** | **Upper Extreme** | **Target Value** | **Reference Value** | **Upper Extreme** |
| **Submerged sill** | Reinforced concrete | 349 | 554 | 861 | 1013 | 1554 | 2343 |
| Double log crib wall | 0,16 | 0,26 | 0,42 | 0,64 | 1,12 | 1,84 |
| Stone masonry | 218 | 243 | 279 | 482 | 546 | 633 |
| **Check dam** | Reinforced concrete | 349 | 554 | 861 | 1029 | 1574 | 2386 |
| Double log crib wall | 0,16 | 0,26 | 0,42 | 0,56 | 0,91 | 1,44 |
| Stone masonry | 218 | 243 | 279 | 526 | 602 | 713 |
| **Bank protection** | Double log crib wall | 0,47 | 0,79 | 1,26 | 2,13 | 3,97 | 6,71 |
| Single log crib wall | 0,10 | 0,18 | 0,29 | 0,44 | 0,89 | 1,55 |
| Stone masonry | 218 | 243 | 279 | 484 | 555 | 660 |
| Riprap | 0,09 | 0,15 | 0,24 | 0,49 | 0,84 | 1,36 |
| Riprap in concrete | 91 | 189 | 333 | 310 | 625 | 1094 |
| **Impact indicator** | | **Ozone layer depletion - ODP steady state (ODP) [kg CFC-11 eq./FU]** | | | | | |
| **Construction phase benchmarks** | | | **Life cycle benchmarks** | | |
| **Construction type** | **Construction material** | **Target Value** | **Reference Value** | **Upper Extreme** | **Target Value** | **Reference Value** | **Upper Extreme** |
| **Submerged sill** | Reinforced concrete | 1,90E-05 | 3,20E-05 | 5,10E-05 | 5,30E-05 | 9,00E-05 | 1,45E-04 |
| Double log crib wall | 5,14E-06 | 9,61E-06 | 1,60E-05 | 1,96E-05 | 4,15E-05 | 7,30E-05 |
| Stone masonry | 7,35E-06 | 1,16E-05 | 1,79E-05 | 1,67E-05 | 2,60E-05 | 4,00E-05 |
| **Check dam** | Reinforced concrete | 1,90E-05 | 3,20E-05 | 5,10E-05 | 5,40E-05 | 9,00E-05 | 1,42E-04 |
| Double log crib wall | 5,14E-06 | 9,61E-06 | 1,60E-05 | 1,75E-05 | 3,45E-05 | 5,90E-05 |
| Stone masonry | 7,35E-06 | 1,16E-05 | 1,79E-05 | 1,80E-05 | 2,85E-05 | 4,40E-05 |
| **Bank protection** | Double log crib wall | 1,54E-05 | 2,88E-05 | 4,80E-05 | 6,73E-05 | 1,44E-04 | 2,60E-04 |
| Single log crib wall | 3,27E-06 | 6,66E-06 | 1,17E-05 | 1,46E-05 | 3,28E-05 | 6,00E-05 |
| Stone masonry | 7,35E-06 | 1,16E-05 | 1,79E-05 | 1,64E-05 | 2,66E-05 | 4,13E-05 |
| Riprap | 2,58E-06 | 5,02E-06 | 8,60E-06 | 1,36E-05 | 2,90E-05 | 5,20E-05 |
| Riprap in concrete | 6,06E-06 | 1,16E-05 | 1,97E-05 | 2,08E-05 | 3,94E-05 | 6,70E-05 |
| **Impact indicator** | | **Eutrophication - generic (EP) [kg PO4--- eq./FU]** | | | | | |
| **Construction phase benchmarks** | | | **Life cycle benchmarks** | | |
| **Construction type** | **Construction material** | **Target Value** | **Reference Value** | **Upper Extreme** | **Target Value** | **Reference Value** | **Upper Extreme** |
| **Submerged sill** | Reinforced concrete | 77 | 122 | 189 | 222 | 452 | 518 |
| Double log crib wall | 0,04 | 0,07 | 0,10 | 0,16 | 0,29 | 0,47 |
| Stone masonry | 48 | 53 | 61 | 106 | 119 | 139 |
| **Check dam** | Reinforced concrete | 77 | 122 | 189 | 225 | 345 | 522 |
| Double log crib wall | 0,04 | 0,07 | 0,10 | 0,14 | 0,22 | 0,35 |
| Stone masonry | 48 | 53 | 61 | 115 | 132 | 156 |
| **Bank protection** | Double log crib wall | 0,12 | 0,20 | 0,30 | 0,54 | 0,99 | 1,65 |
| Single log crib wall | 0,03 | 0,04 | 0,07 | 0,11 | 0,22 | 0,36 |
| Stone masonry | 48 | 53 | 61 | 106 | 122 | 144 |
| Riprap | 0,02 | 0,04 | 0,06 | 0,12 | 0,21 | 0,34 |
| Riprap in concrete | 20 | 41 | 73 | 68 | 137 | 240 |
| **Impact indicator** | | **Photochemical oxidation - high Nox (POCP) [kg ethylene eq./FU]** | | | | | |
| **Construction phase benchmarks** | | | **Life cycle benchmarks** | | |
| **Construction type** | **Construction material** | **Target Value** | **Reference Value** | **Upper Extreme** | **Target Value** | **Reference Value** | **Upper Extreme** |
| **Submerged sill** | Reinforced concrete | 5,98E-02 | 1,03E-01 | 1,68E-01 | 1,70E-01 | 2,90E-01 | 4,60E-01 |
| Double log crib wall | 1,05E-02 | 2,05E-02 | 3,50E-02 | 4,20E-02 | 8,63E-02 | 1,50E-01 |
| Stone masonry | 1,13E-02 | 1,32E-02 | 1,60E-02 | 2,49E-02 | 2,96E-02 | 3,60E-02 |
| **Check dam** | Reinforced concrete | 5,98E-02 | 1,03E-01 | 1,68E-01 | 1,40E-01 | 2,80E-01 | 4,50E-01 |
| Double log crib wall | 1,05E-02 | 2,05E-02 | 3,50E-02 | 3,68E-02 | 7,20E-02 | 1,24E-01 |
| Stone masonry | 1,13E-02 | 1,32E-02 | 1,60E-02 | 2,75E-02 | 3,28E-02 | 4,00E-02 |
| **Bank protection** | Double log crib wall | 3,15E-02 | 6,16E-02 | 1,05E-01 | 1,44E-01 | 3,14E-01 | 5,70E-01 |
| Single log crib wall | 6,79E-03 | 1,42E-02 | 2,50E-02 | 3,01E-02 | 6,89E-02 | 1,26E-01 |
| Stone masonry | 1,13E-02 | 1,32E-02 | 1,60E-02 | 2,52E-02 | 3,06E-02 | 3,86E-02 |
| Riprap | 2,80E-03 | 4,79E-03 | 7,70E-03 | 1,45E-02 | 2,68E-02 | 4,50E-02 |
| Riprap in concrete | 8,28E-03 | 1,42E-02 | 2,30E-02 | 2,80E-02 | 4,82E-02 | 7,80E-02 |
| **Impact indicator** | | **Human toxicity - HTP inf [kg 1,4-dichlorobenzene eq./FU]** | | | | | |
| **Construction phase benchmarks** | | | **Life cycle benchmarks** | | |
| **Construction type** | **Construction material** | **Target Value** | **Reference Value** | **Upper Extreme** | **Target Value** | **Reference Value** | **Upper Extreme** |
| **Submerged sill** | Reinforced concrete | 121,00 | 202,00 | 316,00 | 348,00 | 574,00 | 906,00 |
| Double log crib wall | 7,41 | 13,58 | 22,60 | 30,58 | 57,79 | 99,00 |
| Stone masonry | 35,86 | 48,50 | 66,20 | 79,38 | 106,15 | 145,00 |
| **Check dam** | Reinforced concrete | 121,00 | 202,00 | 316,00 | 292,00 | 546,00 | 827,00 |
| Double log crib wall | 7,41 | 13,58 | 22,60 | 25,94 | 47,19 | 78,76 |
| Stone masonry | 35,86 | 48,50 | 66,20 | 88,24 | 118,87 | 164,00 |
| **Bank protection** | Double log crib wall | 22,24 | 40,73 | 67,80 | 104,52 | 204,57 | 353,00 |
| Single log crib wall | 4,84 | 9,37 | 16,05 | 21,80 | 46,61 | 83,40 |
| Stone masonry | 35,86 | 48,50 | 66,20 | 80,11 | 107,09 | 145,00 |
| Riprap | 3,69 | 6,44 | 10,43 | 19,07 | 36,92 | 63,40 |
| Riprap in concrete | 23,27 | 46,18 | 79,90 | 76,77 | 153,63 | 268,00 |
| **Impact indicator** | | **Terrestrial ecotoxicity - TETP inf [kg 1,4-dichlorobenzene eq./FU]** | | | | | |
| **Construction phase benchmarks** | | | **Life cycle benchmarks** | | |
| **Construction type** | **Construction material** | **Target Value** | **Reference Value** | **Upper Extreme** | **Target Value** | **Reference Value** | **Upper Extreme** |
| **Submerged sill** | Reinforced concrete | 2,04 | 3,75 | 6,25 | 5,78 | 10,85 | 18,40 |
| Double log crib wall | 0,13 | 0,24 | 0,40 | 0,51 | 1,07 | 1,90 |
| Stone masonry | 0,37 | 0,46 | 0,60 | 0,82 | 1,04 | 1,37 |
| **Check dam** | Reinforced concrete | 2,04 | 3,75 | 6,25 | 4,50 | 10,72 | 18,27 |
| Double log crib wall | 0,13 | 0,24 | 0,40 | 0,43 | 0,86 | 1,49 |
| Stone masonry | 0,37 | 0,46 | 0,60 | 0,91 | 1,14 | 1,49 |
| **Bank protection** | Double log crib wall | 0,38 | 0,71 | 1,21 | 1,78 | 3,74 | 6,62 |
| Single log crib wall | 0,09 | 0,17 | 0,29 | 0,37 | 0,80 | 1,44 |
| Stone masonry | 0,37 | 0,46 | 0,60 | 0,84 | 1,05 | 1,35 |
| Riprap | 0,05 | 0,09 | 0,15 | 0,26 | 0,51 | 0,88 |
| Riprap in concrete | 0,24 | 0,45 | 0,75 | 0,82 | 1,51 | 2,51 |
