# Supplementary material for: Development of LCA benchmarks for Austrian torrent control structures
Source: Springer Nature journal article supplement (doi:10.1007/s11367-019-01618-6), 2019-04-17
Supplement: MOESM3 [file 16665840]

## Appendix C

| Type of uncertainty | Life cycle stages | Median [kg CO2 eq.] | Contribution of modules to the total result without uncertainties[%] | IQR [kg CO2 eq.] | Contribution of uncertainties to the IQR results[%] |
| --- | --- | --- | --- | --- | --- |
| **Reinforced concrete check dam** | | | | | |
| U1 | A1-A3 |  |  | 46,1 | **31,4** |
| U2 | A1-A3 | 366,7 | 89,5 | 94,3 | **64,1** |
| U3 | A4 | 17,7 | 4,3 | 6,0 | **4,1** |
| U4 | A5 | 25,2 | 6,2 | 0,5 | **0,3** |
| Total construction |  | 409,6 | 100,0 | 147,0 | 100,0 |
| U1-U4 | A1-A5 | 409,6 | 34,3 | 147,0 | **38,2** |
| U5 | B2-B5 | 784,4 | 65,7 | 238,0 | **61,8** |
| Total life cycle |  | 1194,0 | 100,0 | 385,0 | 100,0 |
| **Double log crib wall check dam** | | | | | |
| U1 | A1-A3 |  |  | 1,5 | **7,1** |
| U2 | A1-A3 | 8,2 | 14,5 | 3,0 | **14,1** |
| U3 | A4 | 22,3 | 39,5 | 5,4 | **25,1** |
| U4 | A5 | 25,9 | 46,0 | 11,6 | **53,8** |
| Total construction |  | 56,3 | 100,0 | 21,6 | 100,0 |
| U1-U4 | A1-A5 | 56,3 | 35,0 | 21,6 | **29,7** |
| U5 | B2-B5 | 104,4 | 65,0 | 51,3 | **70,3** |
| Total life cycle |  | 160,7 | 100,0 | 72,9 | 100,0 |
| **Stone masonry check dam** | | | | | |
| U1 | A1-A3 |  |  | 6,8 | **28,0** |
| U2 | A1-A3 | 160,7 | 96,4 | 14,4 | **58,8** |
| U3 | A4 | 2,4 | 1,4 | 1,5 | **5,9** |
| U4 | A5 | 3,5 | 2,1 | 1,8 | **7,2** |
| Total construction |  | 166,7 | 100,0 | 24,4 | 100,0 |
| U1-U4 | A1-A5 | 166,7 | 40,9 | 24,4 | **45,6** |
| U5 | B2-B5 | 240,8 | 59,1 | 29,2 | **54,4** |
| Total life cycle |  | 407,5 | 100,0 | 53,6 | 100,0 |

**Table S5** Sensitivity analysis and uncertainty contribution analysis of check dams LCA results and benchmarks
